# Supplementary material
Source: publisher figshare collection journal article supplement (https://tandf.figshare.com/ndownloader/files/22668779)
Supplement: Supplementary file 1 [file 22668779]

**Supplementary**

All of the articles in Dagens Nyheter, Västerbottens-Kuriren, Göteborgs-Posten and Nerikes Allehanda that were available in Mediearkivet (2018-04-01) that included the word *nyckelbiotop** (in English woodland key habitat).

| ID | Titel | Newspaper | Publishing date |
| --- | --- | --- | --- |
| 1 | "Glömda" träd ger nytt skogsbruk | Dagens Nyheter | 1991-12-06 |
| 1 | "Glömda" träd ger nytt skogsbruk | Dagens Nyheter | 1991-12-06 |
| 2 | Skogsexportföretag köper timmer från Njakafjäll | Västerbottens-Kuriren | 1993-10-16 |
| 3 | Unknown | Västerbottens-Kuriren | 1994-01-03 |
| 3 | Unknown | Västerbottens-Kuriren | 1994-01-03 |
| 3 | Unknown | Västerbottens-Kuriren | 1994-01-03 |
| 4 | Satelliter hjälp i skogen | Västerbottens-Kuriren | 1994-03-04 |
| 5 | Protest mot nya hus i Floda - Ovärderligt naturområde riskerar att förstöras | Göteborgs-Posten | 1994-06-20 |
| 6 | Fladdermössen vann. E4:an tvingas att ta en omväg runt Vendelsjön | Dagens Nyheter | 1994-08-17 |
| 7 | "Många skyddsvärda skogar avverkas" | Västerbottens-Kuriren | 1994-09-16 |
| 8 | "Vårt folk har kompetensen" | Västerbottens-Kuriren | 1994-09-16 |
| 9 | Vad hände med löftena att bevara gammelskogen? | Göteborgs-Posten | 1994-12-02 |
| 10 | Gränslöst skogsprojekt | Västerbottens-Kuriren | 1995-03-02 |
| 11 | De kämpar för sin skog - Boende känner sig lurade av kommunen | Göteborgs-Posten | 1995-04-12 |
| 12 | Protester mot miljömärkning. Skogsindustrin vill ändra | Dagens Nyheter | 1995-05-24 |
| 13 | Resolutioner räcker inte som skydd. Rovdjur och renar blir inte goda | Dagens Nyheter | 1995-11-13 |
| 14 | Piloterna i skogen | Västerbottens-Kuriren | 1995-11-29 |
| 15 | Okunskap hotar naturen | Västerbottens-Kuriren | 1996-05-10 |
| 16 | Britter vill rädda gammelskog | Göteborgs-Posten | 1996-10-27 |
| 17 | Motorsågens tid inte förbi | Västerbottens-Kuriren | 1997-01-14 |
| 18 | Ont om skogar för hotade arter | Göteborgs-Posten | 1997-02-02 |
| 19 | Sörforsskogen värd att skyddas | Västerbottens-Kuriren | 1997-03-19 |
| 20 | Miljövänner vädjar till Anna Lindh | Göteborgs-Posten | 1997-04-09 |
| 21 | Är ekologisk landskapsplanering ett alternativ? | Göteborgs-Posten | 1997-04-14 |
| 22 | Mitt i naturen | Västerbottens-Kuriren | 1997-07-23 |
| 23 | Biologisk mångfald har prioriterats bort? Forskare och naturvårdare besvikna | Nerikes Allehanda | 1997-09-22 |
| 23 | Biologisk mångfald har prioriterats bort? Forskare och naturvårdare besvikna | Nerikes Allehanda | 1997-09-22 |
| 23 | Biologisk mångfald har prioriterats bort? Forskare och naturvårdare besvikna | Nerikes Allehanda | 1997-09-22 |
| 24 | Livlig aktivitet i fågelklubben | Nerikes Allehanda | 1997-09-25 |
| 25 | Invändning: "Assidomän har och tar ansvar" | Dagens Nyheter | 1997-10-17 |
| 26 | Greenpeace anklagar Assidomän för löftesbrott | Göteborgs-Posten | 1997-10-19 |
| 27 | Kling gästar månadsmöte | Nerikes Allehanda | 1997-11-04 |
| 28 | Berättade om Liaskogen | Nerikes Allehanda | 1997-11-11 |
| 29 | Är först i Sverige med kravmärkt virke | Nerikes Allehanda | 1997-11-14 |
| 30 | Vill skydda avverkningshotad naturskog | Västerbottens-Kuriren | 1997-12-10 |
| 31 | Skogsägare drabbas av "säljstopp" | Västerbottens-Kuriren | 1997-12-31 |
| 32 | Ojämn kamp om skogen - Naturvänner vill att Ale köper hotade området - men pengar saknas | Göteborgs-Posten | 1998-02-08 |
| 32 | Ojämn kamp om skogen - Naturvänner vill att Ale köper hotade området - men pengar saknas | Göteborgs-Posten | 1998-02-08 |
| 33 | Känsliga områden kan hittas | Västerbottens-Kuriren | 1998-02-12 |
| 34 | Värdefull skog avverkas | Västerbottens-Kuriren | 1998-02-18 |
| 35 | Värdefull miljö i fara "Skogen i Lilla Edet är minst lika fin som den i Svartedalen" | Göteborgs-Posten | 1998-03-03 |
| 35 | Värdefull miljö i fara "Skogen i Lilla Edet är minst lika fin som den i Svartedalen" | Göteborgs-Posten | 1998-03-03 |
| 35 | Värdefull miljö i fara "Skogen i Lilla Edet är minst lika fin som den i Svartedalen" | Göteborgs-Posten | 1998-03-03 |
| 36 | Kyrkskogen kan bli urskog | Göteborgs-Posten | 1998-03-17 |
| 37 | Gröna skogsplaner hotas - Länets skogsbönder rasar mot nya miljöbalken | Nerikes Allehanda | 1998-03-31 |
| 38 | Miljöbalk förutsätter statligt stöd | Västerbottens-Kuriren | 1998-04-02 |
| 39 | Skogen grönare på fler än ett sätt | Västerbottens-Kuriren | 1998-04-04 |
| 40 | Skogsbruket satsar på miljömärkning | Göteborgs-Posten | 1998-04-15 |
| 41 | Små skogsbruk miljömärks - Följer efter i de stora skogsbolagens spår | Nerikes Allehanda | 1998-04-15 |
| 42 | Mindre skogsägare miljömärker sitt skogsbruk | Västerbottens-Kuriren | 1998-04-15 |
| 43 | Äldre lövskog kan skyddas | Göteborgs-Posten | 1998-04-17 |
| 44 | "Lövskogsområde bör skyddas" | Göteborgs-Posten | 1998-04-26 |
| 45 | Utveckla skogsnäringen | Västerbottens-Kuriren | 1998-05-22 |
| 46 | "Vi kan inte skydda alla områden" | Nerikes Allehanda | 1998-06-30 |
| 47 | Intressant förslag från skogsägarna. Fem års uppskov med avverkningar ger | Dagens Nyheter | 1998-08-19 |
| 48 | Skogsägare oroliga för ekonomin | Göteborgs-Posten | 1998-08-19 |
| 48 | Skogsägare oroliga för ekonomin | Göteborgs-Posten | 1998-08-19 |
| 49 | Ingen råvara från nyckelbiotoper | Västerbottens-Kuriren | 1998-08-27 |
| 50 | Regeringen lovar dubblera skogsanslag | Västerbottens-Kuriren | 1998-09-03 |
| 50 | Regeringen lovar dubblera skogsanslag | Västerbottens-Kuriren | 1998-09-03 |
| 51 | Sverige runt: Visby | Dagens Nyheter | 1998-09-10 |
| 52 | Kungens skog miljömärks | Dagens Nyheter | 1998-10-14 |
| 53 | Kungen miljömärker skog | Nerikes Allehanda | 1998-10-14 |
| 54 | Olika modeller för skogsskydd | Västerbottens-Kuriren | 1998-10-22 |
| 55 | Skogsaffär kritiseras hårt - Staten missar chansen att värna skyddsvärda områden | Göteborgs-Posten | 1998-10-24 |
| 55 | Skogsaffär kritiseras hårt - Staten missar chansen att värna skyddsvärda områden | Göteborgs-Posten | 1998-10-24 |
| 56 | "Grön" plan för skogsbruket | Västerbottens-Kuriren | 1998-10-29 |
| 57 | Skog avverkas trots protester | Göteborgs-Posten | 1998-11-05 |
| 58 | Polisen grep 15 aktivister | Västerbottens-Kuriren | 1998-11-06 |
| 58 | Polisen grep 15 aktivister | Västerbottens-Kuriren | 1998-11-06 |
| 59 | Greenpeace fortsätter skogsstrid | Göteborgs-Posten | 1998-11-07 |
| 60 | "Naturen är inte svensk" | Västerbottens-Kuriren | 1998-11-07 |
| 61 | Skogsaktivister fick ge upp | Nerikes Allehanda | 1998-11-09 |
| 62 | Skogsbolagen har gått för långt | Västerbottens-Kuriren | 1998-11-11 |
| 63 | Greenpeace efterlyser debatt på sakligt plan | Västerbottens-Kuriren | 1998-11-14 |
| 64 | SCA fann inget fel på virket från Arvliden | Västerbottens-Kuriren | 1998-11-19 |
| 65 | Skogsnäringen riskerar att slås ut | Västerbottens-Kuriren | 1998-11-21 |
| 66 | En vinst att sälja hälften av skogen | Göteborgs-Posten | 1998-11-29 |
| 67 | Bruka och bevara skogens värden | Västerbottens-Kuriren | 1998-11-30 |
| 68 | Skogsskydd - biologisk mångfald | Västerbottens-Kuriren | 1998-12-09 |
| 69 | Skogen miljöredovisas | Västerbottens-Kuriren | 1998-12-28 |
| 70 | Bevara nyckelbioptoperna | Västerbottens-Kuriren | 1998-12-29 |
| 71 | Unik skogsinventering | Västerbottens-Kuriren | 1999-01-14 |
| 71 | Unik skogsinventering | Västerbottens-Kuriren | 1999-01-14 |
| 72 | Sumpskog inventerad - och den var mer påverkad än experterna väntat | Göteborgs-Posten | 1999-01-16 |
| 73 | Här ska skogens hotade arter få en chans att leva | Nerikes Allehanda | 1999-01-16 |
| 74 | 80 000 hektar sumpskogar | Västerbottens-Kuriren | 1999-01-16 |
| 75 | Unik inventering av länets natur | Västerbottens-Kuriren | 1999-01-16 |
| 76 | Oklarheter om värdefull skog | Västerbottens-Kuriren | 1999-02-04 |
| 77 | Tunnlar kan rädda hus längs E6 | Göteborgs-Posten | 1999-02-11 |
| 78 | Schlaug nöjd med miljöbeslut | Dagens Nyheter | 1999-03-18 |
| 79 | Skogsskyddet kräver mer folk | Göteborgs-Posten | 1999-03-18 |
| 80 | Olles Hage blir naturreservat | Nerikes Allehanda | 1999-05-03 |
| 81 | Olles Hage naturreservat | Nerikes Allehanda | 1999-05-04 |
| 82 | DN DEBATT: "Kyrkan jumbo i skogen". Naturskyddsföreningen i riksenkät: | Dagens Nyheter | 1999-05-05 |
| 83 | Skogen: Industri i konflikt med naturvård | Dagens Nyheter | 1999-05-11 |
| 84 | Skogsbolagen bättre än kyrkan | Göteborgs-Posten | 1999-05-16 |
| 85 | Lustfyllt sökande efter källans språng | Göteborgs-Posten | 1999-06-13 |
| 86 | Skogen som råvara och/eller livsmiljö - Möte mellan naturskyddsföreningen och skogsägarna | Nerikes Allehanda | 1999-06-24 |
| 86 | Skogen som råvara och/eller livsmiljö - Möte mellan naturskyddsföreningen och skogsägarna | Nerikes Allehanda | 1999-06-24 |
| 87 | Med pennan i Sibiriens svarta jord | Göteborgs-Posten | 1999-07-02 |
| 88 | Missar vid inventering - Två av tre skyddsvärda skogar kom inte med | Göteborgs-Posten | 1999-07-02 |
| 88 | Missar vid inventering - Två av tre skyddsvärda skogar kom inte med | Göteborgs-Posten | 1999-07-02 |
| 89 | "Kyrkans skog bör bli naturreservat" | Göteborgs-Posten | 1999-07-20 |
| 89 | "Kyrkans skog bör bli naturreservat" | Göteborgs-Posten | 1999-07-20 |
| 90 | DN Debatt: "Näringsministrarna ett miljöhot" | Dagens Nyheter | 1999-07-21 |
| 91 | Nya värden i skogsvård | Nerikes Allehanda | 1999-09-01 |
| 92 | Död ved och "evighetsträd" sparas - Skogsvård med helt andra värderingar i dag | Nerikes Allehanda | 1999-09-01 |
| 93 | "Gröna visioner" om Kilsbergen | Nerikes Allehanda | 1999-11-03 |
| 94 | "Rädda Stockholms skog". Protest mot försäljningen. | Dagens Nyheter | 1999-11-09 |
| 95 | Fältbiologer kräver orörd skog | Västerbottens-Kuriren | 2000-01-10 |
| 96 | Kämpar för nyupptäckt vildmark - Företag vill öppna grus- och bergtäkt på platsen "Bör bli naturreservat" | Nerikes Allehanda | 2000-03-09 |
| 97 | Brett upprop för skogen | Västerbottens-Kuriren | 2000-04-01 |
| 98 | Storsatsning i Robertsfors | Västerbottens-Kuriren | 2000-04-15 |
| 99 | Hur kan avverkning vara bra exempel? | Nerikes Allehanda | 2000-05-22 |
| 100 | Skolelever fick lektion i skogskunskap | Västerbottens-Kuriren | 2000-05-31 |
| 101 | Vädret blir bättre i norr | Göteborgs-Posten | 2000-07-25 |
| 102 | DN DEBATT: "Miljöjournalister sviker sitt uppdrag". | Dagens Nyheter | 2000-08-02 |
| 103 | "Markägarnas ställning stärkt trots miljöbråk" | Dagens Nyheter | 2000-08-05 |
| 104 | Värdefull skog i Gullbringa Länsstyrelsen vill skapa naturreservat men markägaren klagar över ersättningen | Göteborgs-Posten | 2000-09-17 |
| 104 | Värdefull skog i Gullbringa Länsstyrelsen vill skapa naturreservat men markägaren klagar över ersättningen | Göteborgs-Posten | 2000-09-17 |
| 105 | Skogsbruk är inget hot mot den biologiska mångfalden | Västerbottens-Kuriren | 2000-11-21 |
| 106 | Flexibla, kreativa naturreservat | Västerbottens-Kuriren | 2000-11-28 |
| 107 | Fullt av fin natur | Nerikes Allehanda | 2000-12-14 |
| 108 | Skogen har fler naturvärden | Västerbottens-Kuriren | 2000-12-16 |
| 109 | Striden om Ranebo hårdnar - Ägaren vill börja avverka | Göteborgs-Posten | 2001-01-13 |
| 110 | Drygt hälften klarar inte tioårsregn - Konsultrapport om kommunens dagvattensystem | Nerikes Allehanda | 2001-01-24 |
| 111 | Planer på nytt naturreservat | Nerikes Allehanda | 2001-03-15 |
| 112 | Oppositionen vill stoppa ny väg | Dagens Nyheter | 2001-04-21 |
| 113 | Modernt skogsbruk bättre för viltet | Västerbottens-Kuriren | 2001-04-27 |
| 114 | Svamp hindrar bostäder i Brottkärr | Göteborgs-Posten | 2001-05-14 |
| 115 | Signalarter i bokform | Göteborgs-Posten | 2001-06-17 |
| 116 | Synpunkter från boende längs riksväg 51 | Nerikes Allehanda | 2001-09-18 |
| 117 | Vilhelmina satsar på skogen | Västerbottens-Kuriren | 2001-09-27 |
| 118 | Skogen trängs undan när staden växer | Göteborgs-Posten | 2001-11-04 |
| 118 | Skogen trängs undan när staden växer | Göteborgs-Posten | 2001-11-04 |
| 119 | Trädkraft mot sjukdom och olyckor | Göteborgs-Posten | 2001-12-02 |
| 120 | Skövling av skog i blivande naturreservat | Göteborgs-Posten | 2001-12-06 |
| 121 | Skövling av skog i blivande naturreservat | Göteborgs-Posten | 2001-12-07 |
| 121 | Skövling av skog i blivande naturreservat | Göteborgs-Posten | 2001-12-07 |
| 121 | Skövling av skog i blivande naturreservat | Göteborgs-Posten | 2001-12-07 |
| 122 | Böter för trädfällning i urskog | Nerikes Allehanda | 2001-12-24 |
| 123 | Arboga OK fick ja till tävling i maj - men tävlingar på vår och försommar "bör undvikas" i fortsättningen | Nerikes Allehanda | 2001-12-28 |
| 124 | Två system för skogscertifiering kan bli ett | Västerbottens-Kuriren | 2002-01-04 |
| 125 | "Miljömärkning en bluff" | Västerbottens-Kuriren | 2002-01-04 |
| 125 | "Miljömärkning en bluff" | Västerbottens-Kuriren | 2002-01-04 |
| 126 | Bråtaskogen kan jämnas med marken | Göteborgs-Posten | 2002-02-07 |
| 127 | Bråtaskogen kan jämnas med marken | Göteborgs-Posten | 2002-02-07 |
| 128 | Bråtaskogen kan jämnas med marken | Göteborgs-Posten | 2002-02-07 |
| 129 | Skogen kan jämnas med marken - Naturskyddsföreningen riktar hård kritik mot Svenska kyrkans utförsäljning | Göteborgs-Posten | 2002-02-08 |
| 130 | Skydd av skog får underkänt | Västerbottens-Kuriren | 2002-02-12 |
| 131 | Inga tjädrar enligt bolaget | Västerbottens-Kuriren | 2002-02-12 |
| 132 | Skydd av skog får underkänt | Västerbottens-Kuriren | 2002-02-12 |
| 133 | Inga tjädrar enligt bolaget | Västerbottens-Kuriren | 2002-02-12 |
| 134 | Skydd av skog får underkänt | Västerbottens-Kuriren | 2002-02-12 |
| 135 | Inga tjädrar enligt bolaget | Västerbottens-Kuriren | 2002-02-12 |
| 136 | Protest mot avverkning | Västerbottens-Kuriren | 2002-03-07 |
| 137 | Protest mot avverkning | Västerbottens-Kuriren | 2002-03-07 |
| 138 | Protest mot avverkning | Västerbottens-Kuriren | 2002-03-07 |
| 139 | Ökat motstånd mot naturgasledning | Göteborgs-Posten | 2002-03-25 |
| 140 | Ökat motstånd mot naturgasledning | Göteborgs-Posten | 2002-03-25 |
| 141 | De vill stoppa gasledningen - men Nova naturgas hoppas börja bygga redan till hösten | Göteborgs-Posten | 2002-03-26 |
| 142 | Naturvärden utvecklas i Frövi - Lindesbergsbostäder gör Kilskogen ännu attraktivare | Nerikes Allehanda | 2002-04-04 |
| 143 | Naturvärden utvecklas i Frövi | Nerikes Allehanda | 2002-04-04 |
| 144 | Motgång för vindkraft i Svenshögen | Göteborgs-Posten | 2002-05-16 |
| 145 | Skogen en hjärtefråga i Hjärtum - Hela bygden engagerar sig för den unika miljön | Göteborgs-Posten | 2002-05-16 |
| 145 | Skogen en hjärtefråga i Hjärtum - Hela bygden engagerar sig för den unika miljön | Göteborgs-Posten | 2002-05-16 |
| 146 | Domedagsprofeternas lovsång till Livet | Nerikes Allehanda | 2002-07-14 |
| 147 | Skogsbolag vill fälla skyddad skog | Göteborgs-Posten | 2002-07-15 |
| 148 | Avverkning hot mot sällsynta arter | Västerbottens-Kuriren | 2002-08-01 |
| 149 | Avverkning hot mot sällsynta arter | Västerbottens-Kuriren | 2002-08-01 |
| 150 | Vill ändra definition på nyckelbiotop | Västerbottens-Kuriren | 2002-08-05 |
| 151 | Vill ändra definition på nyckelbiotop | Västerbottens-Kuriren | 2002-08-05 |
| 151 | Vill ändra definition på nyckelbiotop | Västerbottens-Kuriren | 2002-08-05 |
| 152 | Brister i skogshanteringen | Göteborgs-Posten | 2002-08-20 |
| 153 | Brister i skogshanteringen - Statligt bolag följer inte riksdagens miljömål | Göteborgs-Posten | 2002-08-20 |
| 154 | Vindkraftsbolag byter taktik i Svenshögen | Göteborgs-Posten | 2002-09-08 |
| 155 | Trolla inte bort kritiken | Göteborgs-Posten | 2002-09-13 |
| 156 | Trolla inte bort kritiken | Göteborgs-Posten | 2002-09-13 |
| 157 | Malmletningstillstånd kommer att överklagas | Nerikes Allehanda | 2002-10-06 |
| 158 | Stenungsund får bidrag till kalkning | Göteborgs-Posten | 2002-10-17 |
| 159 | Gasledning får gå över skyddad natur | Göteborgs-Posten | 2002-10-23 |
| 160 | Alingsås kan få naturgasledning | Göteborgs-Posten | 2002-11-15 |
| 161 | Naturvårdspris till Göteborgs stift | Göteborgs-Posten | 2002-12-23 |
| 162 | Oviktig nyckelbiotop | Nerikes Allehanda | 2003-01-09 |
| 163 | Får lov att hålla vildsvin | Göteborgs-Posten | 2003-01-12 |
| 164 | Den värdefulla skogen | Dagens Nyheter | 2003-02-17 |
| 165 | Den värdefulla skogen | Dagens Nyheter | 2003-02-17 |
| 166 | Skog ska bevaras - och brukas | Dagens Nyheter | 2003-02-24 |
| 167 | Höga naturvärden behöver skydd | Dagens Nyheter | 2003-02-24 |
| 168 | Ingen biologisk lönsamhet | Dagens Nyheter | 2003-02-24 |
| 169 | Skog ska bevaras - och brukas | Dagens Nyheter | 2003-02-24 |
| 170 | Mosaik av naturtyper ska nu bevaras - Skogsområden i Nora blir "biotopskyddade" | Nerikes Allehanda | 2003-03-23 |
| 171 | Ålderdomlig skönhet bevaras | Dagens Nyheter | 2003-05-26 |
| 172 | Strid om skogarnas behov av skydd | Dagens Nyheter | 2003-05-26 |
| 173 | Dovrasjödalen ännu mer skyddad | Nerikes Allehanda | 2003-05-26 |
| 174 | Urskog avverkades av misstag | Dagens Nyheter | 2003-06-13 |
| 175 | Här är 3G-master olämpliga | Västerbottens-Kuriren | 2003-07-01 |
| 176 | Plantagen - ful och effektiv | Dagens Nyheter | 2003-07-13 |
| 177 | Plantagen - ful och effektiv | Dagens Nyheter | 2003-07-13 |
| 178 | Stor undersökning av gruvor kring Nora | Nerikes Allehanda | 2003-08-03 |
| 179 | Stor undersökning av gruvor kring Nora | Nerikes Allehanda | 2003-08-03 |
| 180 | Gruvor i Nora miljögranskas | Nerikes Allehanda | 2003-08-03 |
| 181 | Nej blev ja - dammen får rustas | Nerikes Allehanda | 2003-08-15 |
| 182 | Vindkraftverk hot mot fladdermöss | Göteborgs-Posten | 2003-08-24 |
| 183 | Unknown | Nerikes Allehanda | 2003-08-24 |
| 184 | Unknown | Nerikes Allehanda | 2003-08-30 |
| 185 | Omdiskuterade allÈer rustas upp | Västerbottens-Kuriren | 2003-09-04 |
| 186 | Länsstyrelsen gav klartecken för avverkning i Bråtaskogen | Göteborgs-Posten | 2003-12-02 |
| 187 | Länsstyrelsen gav klartecken för avverkning i Bråtaskogen | Göteborgs-Posten | 2003-12-02 |
| 188 | Järnvägsplan får tummen upp | Västerbottens-Kuriren | 2004-01-08 |
| 189 | Byborna stoppade skogsmaskiner | Dagens Nyheter | 2004-01-24 |
| 190 | Skogsbolag får hård kritik | Västerbottens-Kuriren | 2004-02-05 |
| 191 | Avsätt Bo Dockered från Sveaskog | Göteborgs-Posten | 2004-02-07 |
| 192 | Avsätt Bo Dockered från Sveaskog | Göteborgs-Posten | 2004-02-07 |
| 193 | Sveaskogs misstag är alltför många | Göteborgs-Posten | 2004-02-25 |
| 194 | Hyggen kan gynna hotade arter | Göteborgs-Posten | 2004-04-16 |
| 195 | Hotade arter minskar i Norrland | Göteborgs-Posten | 2004-04-20 |
| 196 | Skogsbolag avslöjar sina pärlor | Göteborgs-Posten | 2004-04-23 |
| 197 | Skogsbolag avslöjar sina pärlor | Göteborgs-Posten | 2004-04-24 |
| 198 | Unknown | Nerikes Allehanda | 2004-05-19 |
| 199 | Frivillig avsättning ger det bästa naturskyddet | Nerikes Allehanda | 2004-05-27 |
| 200 | Golf banar väg - för ett öppnare landskap | Göteborgs-Posten | 2004-06-13 |
| 200 | Golf banar väg - för ett öppnare landskap | Göteborgs-Posten | 2004-06-13 |
| 201 | Västsvenska pärlor på nätet | Göteborgs-Posten | 2004-07-04 |
| 202 | Vilken skog vill vi ha? | Dagens Nyheter | 2004-07-25 |
| 203 | Vilken skog vill vi ha? | Dagens Nyheter | 2004-07-25 |
| 204 | Kommunen stoppar torpköp | Göteborgs-Posten | 2004-11-01 |
| 205 | Uppenbarligen råder det oklarhet om vissa begrepp som används | Västerbottens-Kuriren | 2005-01-10 |
| 205 | Uppenbarligen råder det oklarhet om vissa begrepp som används | Västerbottens-Kuriren | 2005-01-10 |
| 206 | Unknown | Västerbottens-Kuriren | 2005-01-11 |
| 207 | Moment 22 för skogsägare | Västerbottens-Kuriren | 2005-01-25 |
| 208 | Naturvårdsambitioner utan resurser | Västerbottens-Kuriren | 2005-01-25 |
| 209 | Fler skogar skyddas i nationell skogsstrategi | Göteborgs-Posten | 2005-06-02 |
| 210 | Surfning räddar gammelskog | Dagens Nyheter | 2005-07-17 |
| 211 | Surfning räddar gammelskog | Dagens Nyheter | 2005-07-18 |
| 212 | Unknown | Nerikes Allehanda | 2005-09-04 |
| 213 | Nyckelbiotop stoppar nybygge | Nerikes Allehanda | 2005-09-29 |
| 214 | Nyckelbiotop stoppar nybygge | Nerikes Allehanda | 2005-09-29 |
| 215 | Ovanliga gnagare skyddas i reservat | Göteborgs-Posten | 2005-10-03 |
| 216 | Ovanliga gnagare skyddas i reservat | Göteborgs-Posten | 2005-10-03 |
| 217 | Skogsstyrelsen: Ny strategi för nyckelbiotoperna i Norrtä... | Dagens Nyheter | 2005-10-20 |
| 218 | `Etanolbilarna nytt hot mot hälsan och miljön` | Dagens Nyheter | 2005-11-24 |
| 219 | Etanolbilarna nytt hot mot hälsan och miljön | Dagens Nyheter | 2005-11-24 |
| 220 | Vad ska vi ha den svenska skogen till? | Göteborgs-Posten | 2006-01-10 |
| 221 | Vad ska vi ha den svenska skogen till? | Göteborgs-Posten | 2006-01-10 |
| 222 | Skogsägare uppmanas ge upp sin skog | Västerbottens-Kuriren | 2006-02-17 |
| 222 | Skogsägare uppmanas ge upp sin skog | Västerbottens-Kuriren | 2006-02-17 |
| 223 | Uppror mot reservat | Västerbottens-Kuriren | 2006-04-07 |
| 224 | Uppror mot reservat | Västerbottens-Kuriren | 2006-04-07 |
| 225 | Gör Ön till nationalstadspark | Västerbottens-Kuriren | 2006-04-21 |
| 226 | Gör Ön till nationalstadspark | Västerbottens-Kuriren | 2006-04-21 |
| 227 | YXSJÖBERG | Nerikes Allehanda | 2006-07-22 |
| 228 | Skogen dyrare än på många år | Västerbottens-Kuriren | 2006-08-23 |
| 229 | Skogen dyrare än på många år | Västerbottens-Kuriren | 2006-08-23 |
| 230 | Skogsstyrelsen: Gott om död ved men ont om röj i skogen | Dagens Nyheter | 2006-10-03 |
| 231 | Unknown | Nerikes Allehanda | 2006-10-25 |
| 232 | Ja till ny vattenledning | Göteborgs-Posten | 2006-10-27 |
| 233 | Fruktlöst försök att stoppa avverkning av skog uppfattad som nyckelbiotop | Västerbottens-Kuriren | 2006-12-16 |
| 234 | Unknown | Nerikes Allehanda | 2007-02-12 |
| 235 | Unknown | Nerikes Allehanda | 2007-02-19 |
| 236 | Klart för bygge av ny bro över Norsån | Västerbottens-Kuriren | 2007-02-21 |
| 237 | Sveaskog: Höga betyg i naturhänsyn på Sveaskogs avverknin... | Dagens Nyheter | 2007-03-05 |
| 238 | Efterlyses: en helt ny reservatspolitik! (7/3) | Västerbottens-Kuriren | 2007-03-07 |
| 239 | Ingen rubrik tillgänglig | Nerikes Allehanda | 2007-03-17 |
| 240 | Regeringen måste stoppa skenande markavsättningar (17/3) | Västerbottens-Kuriren | 2007-03-17 |
| 241 | Regeringen måste stoppa skenande markavsättningar | Västerbottens-Kuriren | 2007-03-17 |
| 242 | Unknown | Nerikes Allehanda | 2007-03-29 |
| 243 | Unknown | Nerikes Allehanda | 2007-04-21 |
| 244 | Skogsstyrelsen: Nya allmänna råd för kvävegödsling i skogen | Dagens Nyheter | 2007-04-25 |
| 245 | Naturvårdsverket motarbetar husbyggen | Nerikes Allehanda | 2007-05-28 |
| 246 | Naturvårdsverket motarbetar husbyggen | Nerikes Allehanda | 2007-05-29 |
| 247 | Välskött skog bäst för miljön (1/6) | Västerbottens-Kuriren | 2007-06-01 |
| 248 | Välskött skog bäst för miljön | Västerbottens-Kuriren | 2007-06-01 |
| 249 | Lillängens skyddande natur invigd | Nerikes Allehanda | 2007-06-11 |
| 250 | Skogsstyrelsen: Stor skillnad på nyckelbiotopers virkesvärde | Dagens Nyheter | 2007-06-21 |
| 251 | En applåd för nya reservatet | Nerikes Allehanda | 2007-09-24 |
| 252 | Gammelskogar på väg att försvinna | Dagens Nyheter | 2007-10-18 |
| 252 | Gammelskogar på väg att försvinna | Dagens Nyheter | 2007-10-18 |
| 253 | Staten har inte råd att göra urskogar till naturreservat | Dagens Nyheter | 2007-10-18 |
| 254 | Skogsägarna sparar frivilligt 5 procent | Dagens Nyheter | 2007-10-18 |
| 255 | SCA anmäls för regelvidrig avverkning | Dagens Nyheter | 2007-11-20 |
| 256 | Kyrka hotas av åtal för skogsavverkning | Göteborgs-Posten | 2008-01-17 |
| 257 | Skogsavverkning kan fälla kyrka | Göteborgs-Posten | 2008-01-19 |
| 258 | Församling kan åtalas för brott | Göteborgs-Posten | 2008-01-20 |
| 259 | Unknown | Nerikes Allehanda | 2008-01-21 |
| 260 | Försäljning mot miljöpolicy | Västerbottens-Kuriren | 2008-01-31 |
| 261 | Unknown | Nerikes Allehanda | 2008-03-12 |
| 262 | Sveaskog: Sveaskog balanserar produktion och miljö | Dagens Nyheter | 2008-04-03 |
| 263 | Sämst på skogsmiljövård? | Västerbottens-Kuriren | 2008-04-21 |
| 264 | Skogsstyrelsen: Få brott mot skogsvårdslagen leder till åtal | Dagens Nyheter | 2008-05-23 |
| 265 | Unknown | Nerikes Allehanda | 2008-06-22 |
| 266 | Unknown | Nerikes Allehanda | 2008-06-22 |
| 267 | Byggföretag riskerar åtal för olovlig avverkning | Göteborgs-Posten | 2008-06-25 |
| 268 | SCA, lämna Dopaberget i fred (28/8) | Västerbottens-Kuriren | 2008-08-28 |
| 269 | SCA, lämna Dopaberget i fred | Västerbottens-Kuriren | 2008-08-28 |
| 270 | Minskat anslag till reservat | Västerbottens-Kuriren | 2008-09-05 |
| 271 | Biologers krav ifrågasätts | Västerbottens-Kuriren | 2008-10-20 |
| 272 | Biologers krav ifrågasätts | Västerbottens-Kuriren | 2008-10-21 |
| 273 | Beviljat tillstånd att leta mineral | Nerikes Allehanda | 2008-11-08 |
| 274 | Svartedalen till salu | Göteborgs-Posten | 2008-12-15 |
| 275 | Svartedalen till salu | Göteborgs-Posten | 2008-12-15 |
| 276 | Utvidga och bind samman | Västerbottens-Kuriren | 2009-03-30 |
| 277 | Utvidga och bind samman | Västerbottens-Kuriren | 2009-03-30 |
| 278 | Björn Ferry kritisk mot avverkning | Västerbottens-Kuriren | 2009-05-27 |
| 279 | Ferry: «Det är vansinne att kommunen ska avverka« | Västerbottens-Kuriren | 2009-05-28 |
| 279 | Ferry: «Det är vansinne att kommunen ska avverka« | Västerbottens-Kuriren | 2009-05-28 |
| 279 | Ferry: «Det är vansinne att kommunen ska avverka« | Västerbottens-Kuriren | 2009-05-28 |
| 280 | Markägare förbjuds fälla brandskadad skog | Göteborgs-Posten | 2009-08-10 |
| 281 | Systemskifte för skydd av skogsmark väntar | Västerbottens-Kuriren | 2009-09-23 |
| 282 | Hänsyn måste tas vid vägförstärkning | Nerikes Allehanda | 2009-10-09 |
| 283 | Väg ska förstärkas | Nerikes Allehanda | 2009-10-09 |
| 284 | Ledningsgator får breddas | Nerikes Allehanda | 2009-12-16 |
| 285 | Exploatera inte Holmöarna | Västerbottens-Kuriren | 2010-02-08 |
| 286 | Köpte skog - men fick inte avverka | Nerikes Allehanda | 2010-06-08 |
| 287 | Gösta Lundkvist, Gunnarn | Västerbottens-Kuriren | 2010-06-17 |
| 288 | Här är chatten med centerpartiet | Västerbottens-Kuriren | 2010-09-07 |
| 289 | Nej till Kronoberget från Naturskyddsföreningen | Nerikes Allehanda | 2010-11-21 |
| 290 | Nej till Kronoberget från Naturskyddsföreningen | Nerikes Allehanda | 2010-11-21 |
| 291 | Nej till Kronoberget från Naturskyddsföreningen | Nerikes Allehanda | 2010-11-21 |
| 292 | Ikea storsatsar på vindkraft | Dagens Nyheter | 2011-02-16 |
| 293 | Ikea storsatsar på vindkraft | Nerikes Allehanda | 2011-02-16 |
| 294 | Avverka inte skogen i Änokdeltat | Dagens Nyheter | 2011-03-14 |
| 295 | Riskerar åtal för avverkning | Västerbottens-Kuriren | 2011-04-27 |
| 296 | Riskerar åtal för oanmäld avverkning | Västerbottens-Kuriren | 2011-04-29 |
| 297 | Skogsbolag skövlar skyddsvärd skog | Dagens Nyheter | 2011-05-08 |
| 297 | Skogsbolag skövlar skyddsvärd skog | Dagens Nyheter | 2011-05-08 |
| 298 | Skogsbolag skövlar skyddsvärd skog | Göteborgs-Posten | 2011-05-08 |
| 298 | Skogsbolag skövlar skyddsvärd skog | Göteborgs-Posten | 2011-05-08 |
| 299 | Skogsbolag skövlar skyddsvärd skog | Nerikes Allehanda | 2011-05-08 |
| 299 | Skogsbolag skövlar skyddsvärd skog | Nerikes Allehanda | 2011-05-08 |
| 300 | Skogsbolag skövlar skyddsvärd skog | Västerbottens-Kuriren | 2011-05-08 |
| 301 | Skogsbolag avverkar skyddsvärd skog | Dagens Nyheter | 2011-05-09 |
| 302 | Skogsbolag skövlar skyddsvärd skog | Dagens Nyheter | 2011-05-09 |
| 303 | Skogsbolag skövlar skyddsvärd skog | Nerikes Allehanda | 2011-05-09 |
| 304 | Flera skyddsvärda skogar skövlade | Dagens Nyheter | 2011-05-13 |
| 305 | Flera skyddsvärda skogar skövlade | Göteborgs-Posten | 2011-05-13 |
| 306 | Flera skyddsvärda skogar skövlade | Göteborgs-Posten | 2011-05-13 |
| 307 | Flera skyddsvärda skogar skövlade | Nerikes Allehanda | 2011-05-13 |
| 308 | Flera skyddsvärda skogar skövlade | Västerbottens-Kuriren | 2011-05-13 |
| 309 | Flera skyddsvärda skogar skövlade | Dagens Nyheter | 2011-05-14 |
| 310 | Anmäld för avverkning utan tillstånd | Nerikes Allehanda | 2011-05-14 |
| 311 | Värdefulla arter i Västerbottens skogar | Västerbottens-Kuriren | 2011-07-09 |
| 312 | Värdefulla arter i Västerbottens skogar | Västerbottens-Kuriren | 2011-07-09 |
| 313 | 200 naturreservat är inte tillräckligt | Nerikes Allehanda | 2011-10-23 |
| 314 | Bristen på pengar bromsar naturvård | Nerikes Allehanda | 2011-10-24 |
| 315 | Bristen på pengar bromsar naturvård | Nerikes Allehanda | 2011-10-24 |
| 316 | Skövling i Svartedalens naturreservat | Göteborgs-Posten | 2011-11-17 |
| 317 | `Kåsan` hotar naturen - därför stoppas sträcka | Nerikes Allehanda | 2011-11-25 |
| 318 | Länsstyrelsen stoppar sträcka i Kåsan | Nerikes Allehanda | 2011-11-26 |
| 319 | Svett, skit, slit och svordomar | Dagens Nyheter | 2011-11-27 |
| 320 | Novemberkåsan polisanmäls - Tävlingsledaren: `Det är löjligt` | Nerikes Allehanda | 2011-12-01 |
| 321 | Kåsan anmäld: "Det är löjligt" | Nerikes Allehanda | 2011-12-02 |
| 322 | Hällefors kan få sina första vindkraftverk | Nerikes Allehanda | 2011-12-22 |
| 323 | Hällefors kan få sina första vindkraftverk | Nerikes Allehanda | 2011-12-22 |
| 324 | VÄRD ATT SKYDDA? | Göteborgs-Posten | 2012-04-22 |
| 324 | VÄRD ATT SKYDDA? | Göteborgs-Posten | 2012-04-22 |
| 325 | Reservat blev skövlat i Karlslund | Nerikes Allehanda | 2012-05-10 |
| 326 | Reservat blev skövlat i Karlslund | Nerikes Allehanda | 2012-05-11 |
| 327 | Fel skog fälld i åtta år | Nerikes Allehanda | 2012-05-12 |
| 328 | Örebro har brutit mot lagen i åtta år | Nerikes Allehanda | 2012-05-12 |
| 329 | Skönheten och odjuren. Så drivs människan ut ur skogen | Dagens Nyheter | 2012-05-13 |
| 330 | Skönheten och odjuren. Så drivs människan ut ur skogen | Dagens Nyheter | 2012-05-13 |
| 331 | "Det finns andra värden än naturen" | Nerikes Allehanda | 2012-05-16 |
| 332 | Bra att marken återställdes | Nerikes Allehanda | 2012-05-19 |
| 333 | repliken: Skogar även i framtiden | Västerbottens-Kuriren | 2012-05-31 |
| 334 | Acceptera oliktänkande | Göteborgs-Posten | 2012-07-31 |
| 335 | Naturskyddet har lagstiftats bort | Västerbottens-Kuriren | 2012-08-27 |
| 336 | Naturskyddet har lagstiftats bort | Västerbottens-Kuriren | 2012-08-27 |
| 337 | MP, FP och V: Miljön får stryka på foten | Göteborgs-Posten | 2012-10-30 |
| 338 | Skogsmaskin körde över fornlämning | Dagens Nyheter | 2012-11-05 |
| 339 | Skogsmaskin körde över fornlämning | Göteborgs-Posten | 2012-11-05 |
| 340 | Skogsmaskin körde över fornlämning | Nerikes Allehanda | 2012-11-05 |
| 341 | Skogsmaskin körde över fornlämning | Västerbottens-Kuriren | 2012-11-05 |
| 342 | Staten måste ta sitt ansvar i skogen | Västerbottens-Kuriren | 2012-12-04 |
| 343 | Staten måste ta sitt ansvar i skogen | Västerbottens-Kuriren | 2012-12-04 |
| 344 | repliken: Dialog och förhandling är vägen till ett hållbart skogsbruk | Västerbottens-Kuriren | 2012-12-29 |
| 345 | Erlandsson har inte gjort rätt i egna skogen | Dagens Nyheter | 2013-04-10 |
| 345 | Erlandsson har inte gjort rätt i egna skogen | Dagens Nyheter | 2013-04-10 |
| 345 | Erlandsson har inte gjort rätt i egna skogen | Dagens Nyheter | 2013-04-10 |
| 346 | Tre frågor till Svarte Swartling | Västerbottens-Kuriren | 2013-06-10 |
| 347 | Norra Skogsägarna i avverkningstoppen | Västerbottens-Kuriren | 2013-09-12 |
| 348 | Röster för och mot vindkraft | Nerikes Allehanda | 2014-02-02 |
| 349 | Röster för och mot vindkraft | Nerikes Allehanda | 2014-02-02 |
| 350 | Tydligare för skogsägare | Västerbottens-Kuriren | 2014-02-11 |
| 351 | Åtgärderna som ska anmälas | Västerbottens-Kuriren | 2014-02-13 |
| 352 | Inget reservat i Svartedalen | Göteborgs-Posten | 2014-02-22 |
| 353 | Lämna området i fred | Nerikes Allehanda | 2014-03-25 |
| 354 | Säg nej till vindkraft i naturskyddsområde | Nerikes Allehanda | 2014-03-25 |
| 355 | Bolidens tillstånd överklagat | Nerikes Allehanda | 2014-04-05 |
| 356 | Bolidens tillstånd överklagat | Nerikes Allehanda | 2014-04-05 |
| 357 | Över 200 namn mot parkplaner | Nerikes Allehanda | 2014-09-21 |
| 358 | Sätt ramar för vindkraften | Västerbottens-Kuriren | 2014-10-22 |
| 359 | Skogsbruket är en miljöfarliga verksamhet | Västerbottens-Kuriren | 2014-11-04 |
| 360 | Järpskådning med pipa ska ske | Nerikes Allehanda | 2015-03-27 |
| 361 | Med sikte på järpe med järppipa och kikare | Nerikes Allehanda | 2015-03-28 |
| 362 | Skövling i nytt naturreservat | Dagens Nyheter | 2015-04-10 |
| 363 | "Man har sågat först och tänkt sedan" | Nerikes Allehanda | 2015-04-29 |
| 364 | Man har sågat först och tänkt sedan Naturskyddsföreningen kritisk mot skogsavverkning på Edö | Nerikes Allehanda | 2015-04-29 |
| 365 | Skogsstyrelsen vill skydda Bastedalskog | Nerikes Allehanda | 2015-06-12 |
| 366 | Sjöbergen - den gröna fristaden | Göteborgs-Posten | 2015-08-23 |
| 367 | Sjöbergen - grön fristad mellan motorvägarna | Göteborgs-Posten | 2015-08-23 |
| 368 | Tillstånd söks för ny bergtäkt | Nerikes Allehanda | 2015-11-02 |
| 369 | Tillstånd söks för ny bergtäkt | Nerikes Allehanda | 2015-11-03 |
| 370 | Igeltjärn kan bli ny nyckelbiotop | Nerikes Allehanda | 2016-03-08 |
| 371 | Höga naturvärden kan skyddas vid Igeltjärn i Vekhyttan | Nerikes Allehanda | 2016-03-08 |
| 372 | Höga naturvärden kan skyddas vid Igeltjärn i Vekhyttan | Nerikes Allehanda | 2016-03-08 |
| 373 | Höga naturvärden kan skyddas vid Igeltjärn i Vekhyttan | Nerikes Allehanda | 2016-03-08 |
| 374 | Vattenfall miljardsatsar på länets elnät | Västerbottens-Kuriren | 2016-04-21 |
| 375 | KALENDARIET | Dagens Nyheter | 2016-05-27 |
| 376 | Förbifart genom skogen väcker miljökämparna | Dagens Nyheter | 2016-06-24 |
| 377 | Förbifart genom skogen väcker miljökämparna | Dagens Nyheter | 2016-06-25 |
| 378 | Löfven och Bucht vill ta ut mer skog | Göteborgs-Posten | 2016-08-31 |
| 379 | Löfven och Bucht vill ta ut mer skog | Västerbottens-Kuriren | 2016-08-31 |
| 380 | Tar upp kampen för skogen | Västerbottens-Kuriren | 2016-08-31 |
| 381 | Protesterar mot avverkning av orörd gammal skog | Västerbottens-Kuriren | 2017-01-30 |
| 382 | Modernt baggböleri när skog ska bevaras/skyddas | Västerbottens-Kuriren | 2017-02-25 |
| 383 | Klimatnyttan av aktivt skogsbruk ännu osäker | Västerbottens-Kuriren | 2017-03-02 |
| 384 | Vi pausar inventeringen av nyckelbiotoper i nordväst | Dagens Nyheter | 2017-03-09 |
| 385 | "Vi pausar inventeringen av nyckelbiotoper i nordväst" | Dagens Nyheter | 2017-03-10 |
| 386 | Paus i inventeringen av nyckelbiotoper | Dagens Nyheter | 2017-03-10 |
| 387 | Repliker. Ett av de största sveken mot naturvården vi sett i Sverige | Dagens Nyheter | 2017-03-10 |
| 388 | Paus i inventering av nyckelbiotoper | Göteborgs-Posten | 2017-03-10 |
| 389 | Paus i inventering av nyckelbiotoper | Västerbottens-Kuriren | 2017-03-10 |
| 390 | "Ett av de värsta sveken vi sett" | Västerbottens-Kuriren | 2017-03-10 |
| 391 | ”Ett av de värsta sveken vi sett” | Västerbottens-Kuriren | 2017-03-11 |
| 391 | ”Ett av de värsta sveken vi sett” | Västerbottens-Kuriren | 2017-03-11 |
| 392 | ’’Ett klokt beslut’’ | Västerbottens-Kuriren | 2017-03-11 |
| 393 | Blunda ej för frivilliga skyddet av skogen | Västerbottens-Kuriren | 2017-03-13 |
| 394 | Ta ansvar för skogen" | Nerikes Allehanda | 2017-03-14 |
| 395 | Ta ansvar för skogen! | Nerikes Allehanda | 2017-03-14 |
| 396 | Repliker. Skogen i nordväst är annorlunda | Dagens Nyheter | 2017-03-17 |
| 397 | "S naiva Europapolitik leder till medborgarmissnöje" | Dagens Nyheter | 2017-03-18 |
| 398 | Protestaktion mot Skogsstyrelsen | Nerikes Allehanda | 2017-03-24 |
| 399 | Död hand över skogen | Nerikes Allehanda | 2017-03-28 |
| 400 | Död hand över skogen | Nerikes Allehanda | 2017-03-28 |
| 401 | Skogsstyrelsens chef får hård intern kritik | Dagens Nyheter | 2017-04-07 |
| 401 | Skogsstyrelsens chef får hård intern kritik | Dagens Nyheter | 2017-04-07 |
| 401 | Skogsstyrelsens chef får hård intern kritik | Dagens Nyheter | 2017-04-07 |
| 402 | Skogsstyrelsens chef får hård intern kritik | Dagens Nyheter | 2017-04-07 |
| 403 | DN Debatt. Bevara de värdefulla skogar som ännu finns kvar i Sverige | Dagens Nyheter | 2017-04-11 |
| 404 | "Stoppa Skogsstyrelsens beslut" | Dagens Nyheter | 2017-04-12 |
| 405 | "Bevara de värdefulla skogar som ännu finns kvar i Sverige" | Dagens Nyheter | 2017-04-12 |
| 406 | Repliker. Aktivt brukad skog ger hållbart samhälle | Dagens Nyheter | 2017-04-13 |
| 407 | Repliker. Subjektiva gränser för nyckelbiotoper | Dagens Nyheter | 2017-04-13 |
| 408 | "Obligatorisk utbildning för statstjänstemän behövs" | Dagens Nyheter | 2017-04-15 |
| 409 | Repliker. Klimatet viktigare än biologisk mångfald | Dagens Nyheter | 2017-04-18 |
| 410 | Repliker. Regeringen måste agera om nyckelbiotoperna | Dagens Nyheter | 2017-04-18 |
| 411 | "Obegripligt att S driver vinstjaktsfrågan mot förlust" | Dagens Nyheter | 2017-04-19 |
| 412 | Repliker. Politiker avgör hur mycket skog som ska skyddas | Dagens Nyheter | 2017-04-19 |
| 413 | Repliker. Miljö- och produktionsmål ska vara jämställda | Dagens Nyheter | 2017-04-20 |
| 414 | Kräver stopp för avverkning av skyddsvärda skogar | Västerbottens-Kuriren | 2017-04-21 |
| 414 | Kräver stopp för avverkning av skyddsvärda skogar | Västerbottens-Kuriren | 2017-04-21 |
| 414 | Kräver stopp för avverkning av skyddsvärda skogar | Västerbottens-Kuriren | 2017-04-21 |
| 415 | Storm i Skogssverige om nyckelbiotoper | Göteborgs-Posten | 2017-04-22 |
| 415 | Storm i Skogssverige om nyckelbiotoper | Göteborgs-Posten | 2017-04-22 |
| 415 | Storm i Skogssverige om nyckelbiotoper | Göteborgs-Posten | 2017-04-22 |
| 416 | TT-löpsedel 22.4 | Göteborgs-Posten | 2017-04-22 |
| 417 | "Ett av de största sveken mot naturvården i Sverige" | Nerikes Allehanda | 2017-04-23 |
| 418 | Ris och ros för återupptagen skogsinventering | Göteborgs-Posten | 2017-04-26 |
| 419 | Nytt om namn och företag | Västerbottens-Kuriren | 2017-05-30 |
| 420 | Fördjupade översiktsplanen har redan gått åt skogen | Västerbottens-Kuriren | 2017-06-16 |
| 421 | Fördjupade översiktsplanen har redan gått åt skogen | Västerbottens-Kuriren | 2017-06-21 |
| 422 | Vattenfall får bygga nya kraftledningar vid Korsnäs | Nerikes Allehanda | 2017-07-24 |
| 423 | Vattenfall får bygga nya kraftledningar vid Frövifors | Nerikes Allehanda | 2017-07-24 |
| 424 | Ett år sedan branden - "Har kunnat gå vidare" | Nerikes Allehanda | 2017-07-31 |
| 425 | Omfattande inventering av skogar i höst | Göteborgs-Posten | 2017-09-04 |
| 426 | Omfattande inventering av skogar i höst | Västerbottens-Kuriren | 2017-09-04 |
| 427 | Självklart för Skogsstyrelsen att acceptera äganderätten | Västerbottens-Kuriren | 2017-12-29 |
| 428 | Självklart för Skogsstyrelsen att acceptera äganderätten | Västerbottens-Kuriren | 2017-12-30 |
| 429 | Naturvård ska ej kränka skogsägarens rätt | Västerbottens-Kuriren | 2018-01-08 |
| 430 | Naturvård ska ej kränka rätt | Västerbottens-Kuriren | 2018-01-09 |
| 431 | replik: Skogsstyrelsen måste i handling visa respekt för äganderätten | Västerbottens-Kuriren | 2018-01-25 |
| 432 | Visa nu i handling respekt för äganderätten | Västerbottens-Kuriren | 2018-01-26 |
| 433 | Skogsstyrelsen visar respekt i handling | Västerbottens-Kuriren | 2018-02-03 |
| 434 | Norra skogsägarna hotar bon | Västerbottens-Kuriren | 2018-02-13 |
| 435 | Norra skogsägarna hotar bon | Västerbottens-Kuriren | 2018-02-14 |
| 436 | Skydda skogen från staten | Västerbottens-Kuriren | 2018-02-27 |
| 437 | Skogsägare: ”Det är ett rättsövergrepp” | Västerbottens-Kuriren | 2018-03-12 |
| 438 | Fjällnära skog | Västerbottens-Kuriren | 2018-03-12 |
| 439 | Bergner: Västerbottnisk försvarsmur vill skydda skogsägarna | Västerbottens-Kuriren | 2018-03-15 |
| 440 | Avverkning omges av en lång rad krav | Nerikes Allehanda | 2018-03-23 |
| 441 | Värna skogens ägare men också dess arter | Västerbottens-Kuriren | 2018-03-23 |
| 442 | Avverkning omges av en lång rad krav | Nerikes Allehanda | 2018-03-23 |
